# Supplementary figures and images for: Медико-профилактические аспекты сохранения и укрепления здоровья студентов в Оренбургском государственном университете
Source: Royal Society of Chemistry journal article supplement (doi:10.1039/d2fo01774a), 2013-01-01

a)

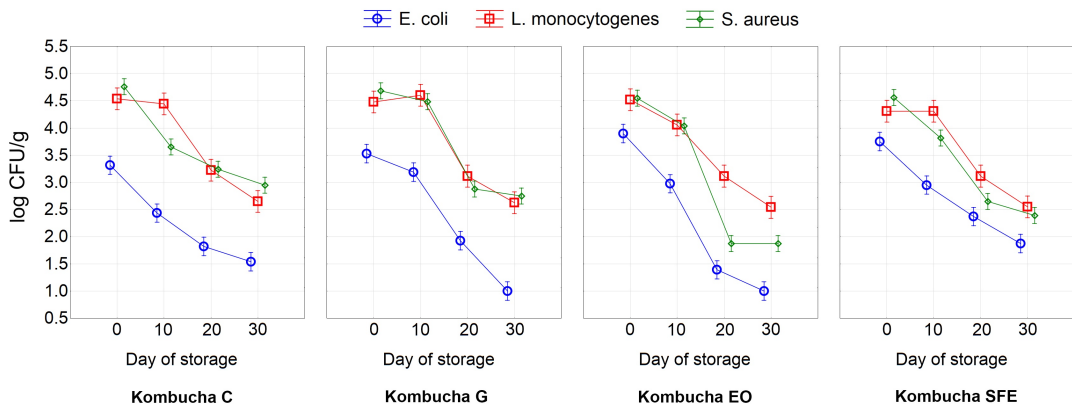

b)

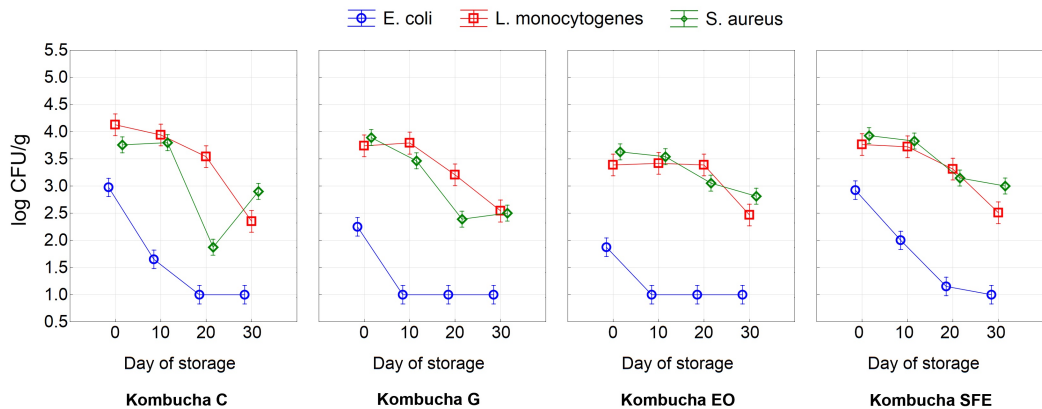

Supplement: d2fo01774a2.pdf [file d2fo01774a2.pdf]

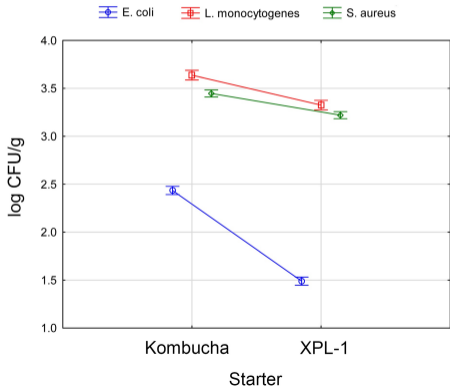

Supplement: d2fo01774a3.pdf [file d2fo01774a3.pdf]

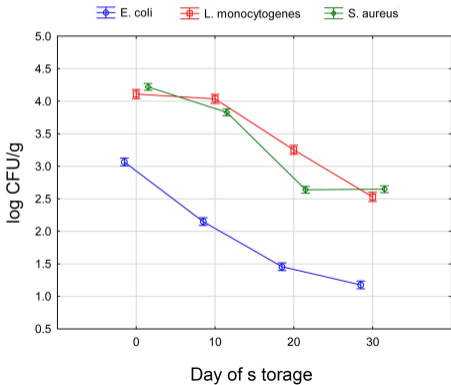

Supplement: d2fo01774a4.pdf [file d2fo01774a4.pdf]
